# Supplementary material for: Public Concerns over Presumed Metal and Radionuclide Pollution: Testing a Possible Link to Ovine Hepatic Melanosis in South Greenland
Source: Research Square preprint supplement (doi:10.21203/rs.3.rs-8010522/v1), 2025-11-18
Supplement: Supplementary file 1 [file 88222013c60792b807cdf875.docx]

**Table 2.** Activity concentrations of 210Po and 210Pb (Bq kg-1 w.w.) and derived annual absorbed dose (μGy/year) from exposure to 210Po.

| **Common name** | **Liver sample** | **Number of samples** | **210Po**  **mean ± *SD*** | **210Po**  **min. - max.** | **Counting uncertainty**  **(2 σ) (Bq kg-1)** | **Number of samples** | **210Pb**  **mean ± *SD*** | **210Pb**  **min. - max.** | **Counting uncertainty**  **(2 σ) (Bq kg-1)** | **Absorbed dose mean ± *SD*** | **Absorbed dose**  **min. - max.** |
| --- | --- | --- | --- | --- | --- | --- | --- | --- | --- | --- | --- |
| Lamb | Case: Acquired melanosis | 7 | 12.3 ± 5.5 | 2.5 – 21.0 | ± 1.4 | 1 | 10 ± | ± 10 | ± 1.4 | 336 ± 150 | 68 – 566 |
| Sheep | Case: Acquired melanosis | 6 | 36.0 ± 12.2 | 13.0 – 49.0 | ± 3.1 | 2 | 9.8 ± 2.0 | 8.4 – 11.1 | ± 1.45 | 982 ± 335 | 346 – 1326 |
| Lamb | Control: Healthy livers | 5 | 22.2 ± 13.0 | 16.0 – 48.4 | ± 2.7 | 2 | 8.3 ± 0.3 | 8.3 – 8.34 | ± 1.2 | 607 ± 354 | 436 – 1322 |
| Sheep | Control: Healthy livers | 1 | 19.4 ± | - 19.4 | ± 2.3 | 1 | 10.4 ± 0.7 | - 10.4 | ± 1.2 | 530 ± | ± 530 |
