# Supplementary material for: Public Concerns over Presumed Metal and Radionuclide Pollution: Testing a Possible Link to Ovine Hepatic Melanosis in South Greenland
Source: Research Square preprint supplement (doi:10.21203/rs.3.rs-8010522/v1), 2025-11-18
Supplement: Supplementary file 2 [file a047935fb79e43072561a3f7.docx]

**Table 1.** Ovineliver samples (n=31) from South Greenland included in the case-control study.

| **Sample ID1** | **Herd ID** | **Date of Slaughter, 2021** | **Age group** | **Post-mortem finding** | **Liver cell pigment2** | **Kupffer cell pigment3** |
| --- | --- | --- | --- | --- | --- | --- |
| CA1 | H2 | 09-23 | Lamb | Acquired melanosis | 2 - 3 | 0 |
| CA2 | H2 | 09-23 | Lamb | Acquired melanosis | 3 | 0 |
| CA3 | H7 | 09-27 | Lamb | Acquired melanosis | 2 | 0 |
| CA4 | H8 | 09-27 | Lamb | Acquired melanosis | 2 | 0 |
| CA5 | H5 | 09-27 | Lamb | Acquired melanosis | 4 | 0 |
| CA6 | H28 | 09-28 | Lamb | Acquired melanosis | 2 - 3 | 0 |
| CA7 | H28 | 09-28 | Lamb | Acquired melanosis | 2 - 3 | 0 |
| CA8 | H32 | 09-30 | Lamb | Acquired melanosis | 3 | 0 |
| CA9 | H35 | 09-30 | Lamb | Acquired melanosis | 2 | + |
| CA10 | H32 | 09-30 | Lamb | Acquired melanosis | 2 | 0 |
| CA11 | H32 | 09-30 | Lamb | Acquired melanosis | 5 | + |
| CA12 | H13 | 10-04 | Lamb | Acquired melanosis | 1 | 0 |
| CA13 | H10 | 10-05 | Lamb | Acquired melanosis | 2 | 0 |
| CA14 | H3 | 10-05 | Lamb | Acquired melanosis | 2 | 0 |
| CA15 | H3 | 10-05 | Lamb | Acquired melanosis | 3 | 0 |
| CA16 | H2 | 10-06 | Sheep | Acquired melanosis | 3 | + |
| CA17 | H9 | 10-06 | Sheep | Acquired melanosis | 3 | + |
| CA18 | H9 | 10-06 | Sheep | Acquired melanosis | 3 | + |
| CA19 | H4 | 10-06 | Sheep | Acquired melanosis | 2 - 3 | 0 |
| CA20 | H3 | 13-10 | Sheep | Acquired melanosis | 5 | + |
| CA21 | H36 | 10-25 | Sheep | Acquired melanosis | 3 | + |
| CO1 | H28 | 09-28 | Lamb | No macroscopic changes | 0 | 0 |
| CO2 | H28 | 09-28 | Lamb | No macroscopic changes | 1 | 0 |
| CO3 | H40 | 09-29 | Lamb | No macroscopic changes | 0 | 0 |
| CO4 | H40 | 09-29 | Lamb | No macroscopic changes | 0 | 0 |
| CO5 | H21 | 10-01 | Lamb | No macroscopic changes | 0 | 0 |
| CO6 | H8 | 10-06 | Lamb | No macroscopic changes | 0 | 0 |
| CO7 | H10 | 10-08 | Lamb | No macroscopic changes | 0 | 0 |
| CO8 | H12 | 10-08 | Lamb | No macroscopic changes | 0 | 0 |
| CO9 | H21 | 10-11 | Lamb | No macroscopic changes | 0 | 0 |
| CO10 | H1 | 10-13 | Sheep | No macroscopic changes | 1 | + |

1: Cases: Sample ID CA1-21; Controls: Sample ID CO1-10

2: Black pigmentation of hematoxylin and eosin-stained liver cells (hepatocytes) was graded visually: 0, not present; 1, very light; 2, light; 3, moderate; 4, marked; 5, severe.

3: Pigmentation of liver macrophages (Kupffer cells) was graded histologically (haematoxylin and eosin staining) as: 0, not present; +, present.
