# Supplementary material for: Public Concerns over Presumed Metal and Radionuclide Pollution: Testing a Possible Link to Ovine Hepatic Melanosis in South Greenland
Source: Research Square preprint supplement (doi:10.21203/rs.3.rs-8010522/v1), 2025-11-18

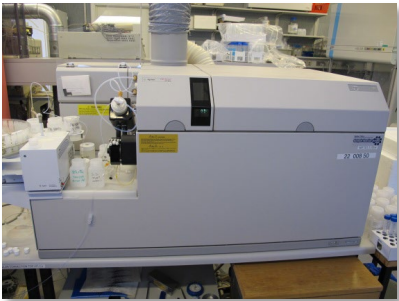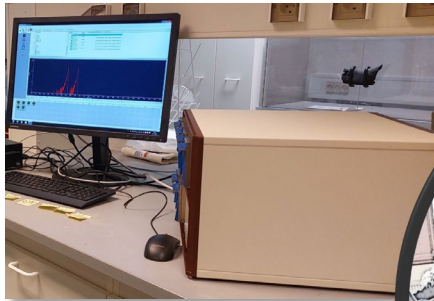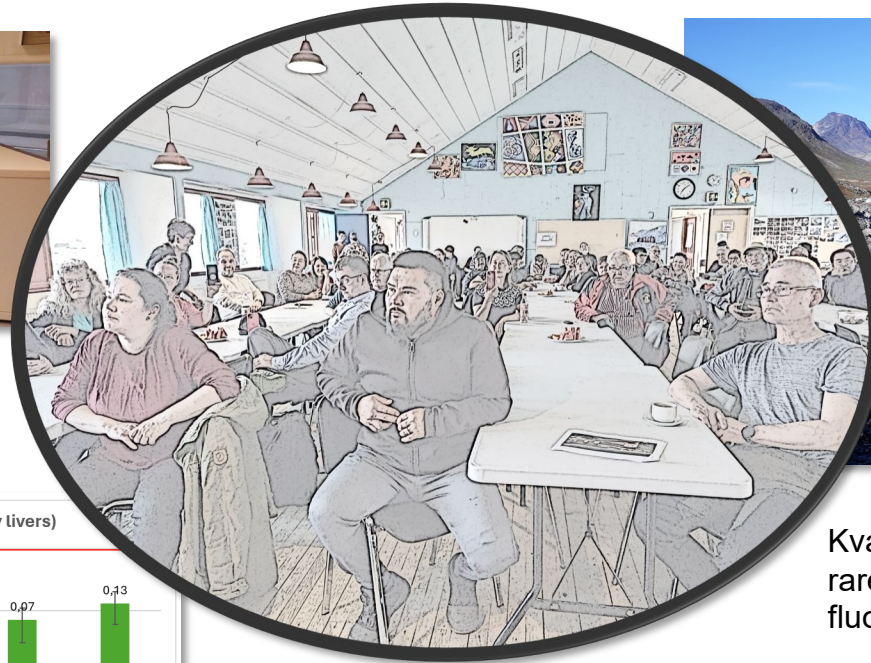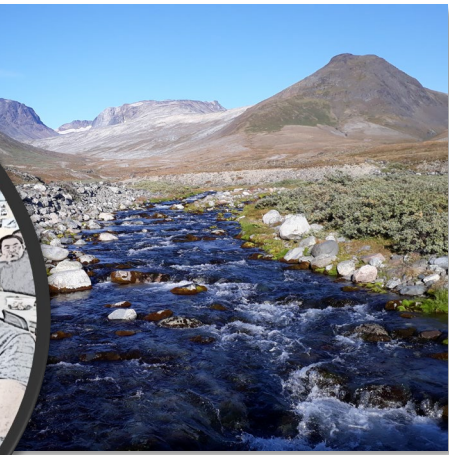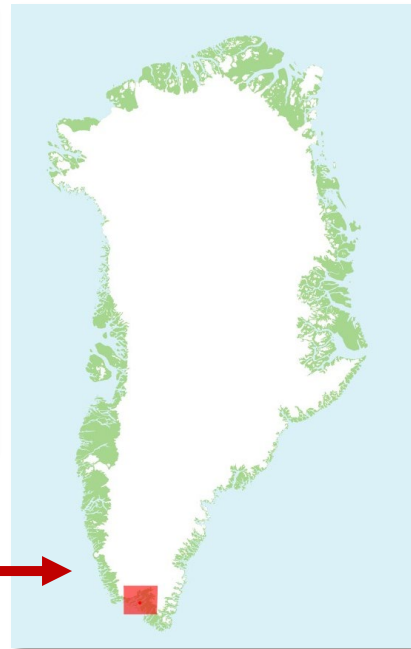

ICP-MS and alpha spectrometer, Roskilde, Denmark

Kvanfjeld exploration activities, rare earth elements, zinc, fluorine, uranium, thorium

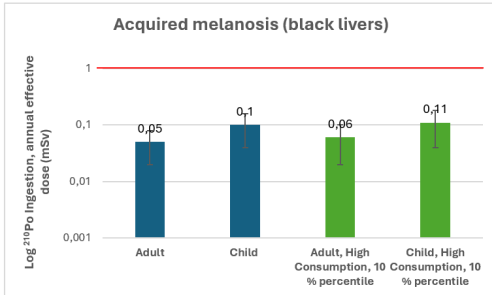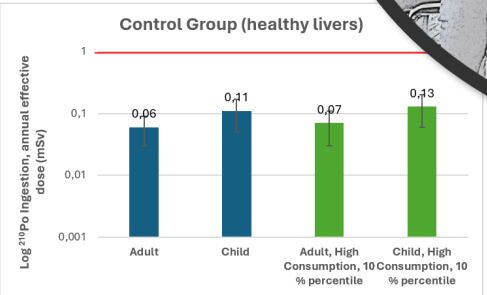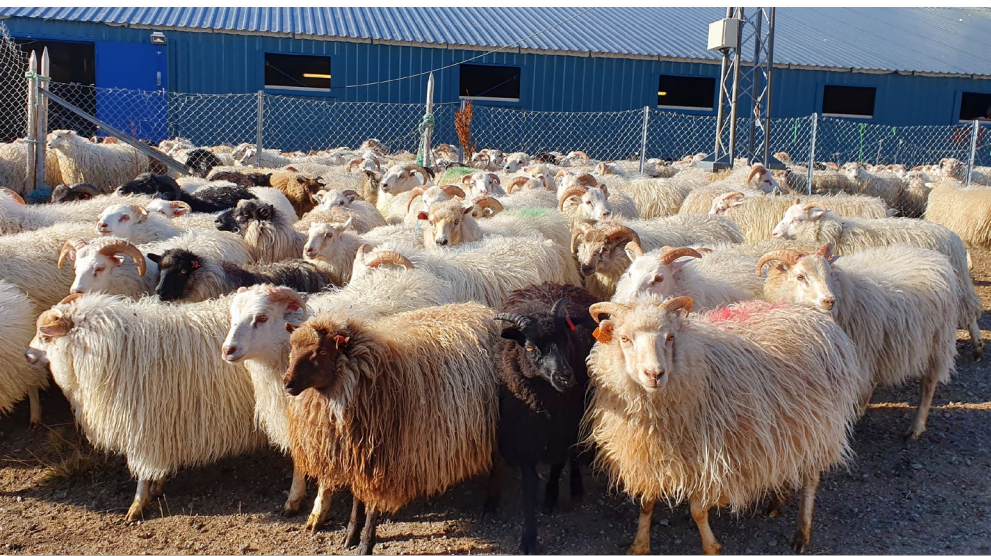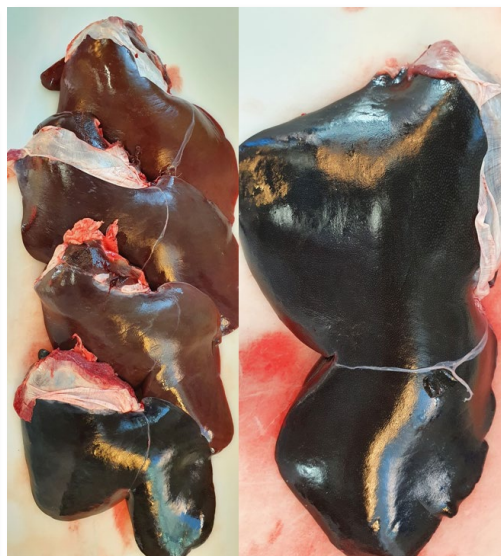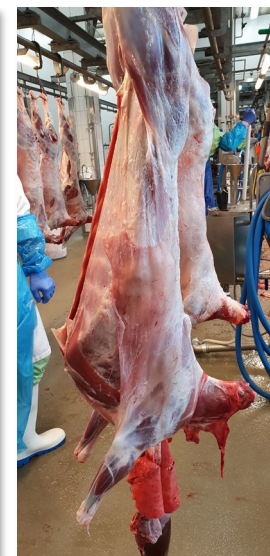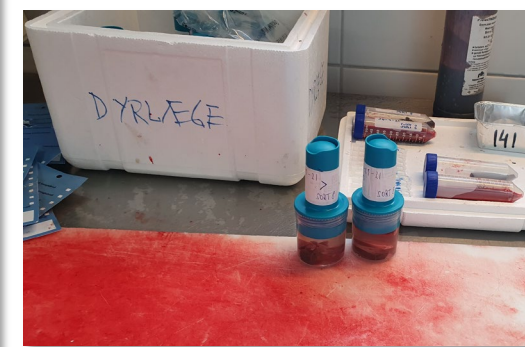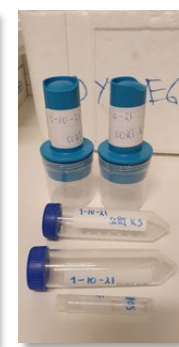

Supplement: Supplementary file 3 [file da9723d32dcbdcca05a33d60.pdf]
